# Supplementary material for: Using Diatom and Apicomplexan Models to Study the Heme Pathway of Chromera velia
Source: MDPI journal article supplement (doi:10.3390/ijms22126495), 2021-06-17
Supplement: s1 [file s1]

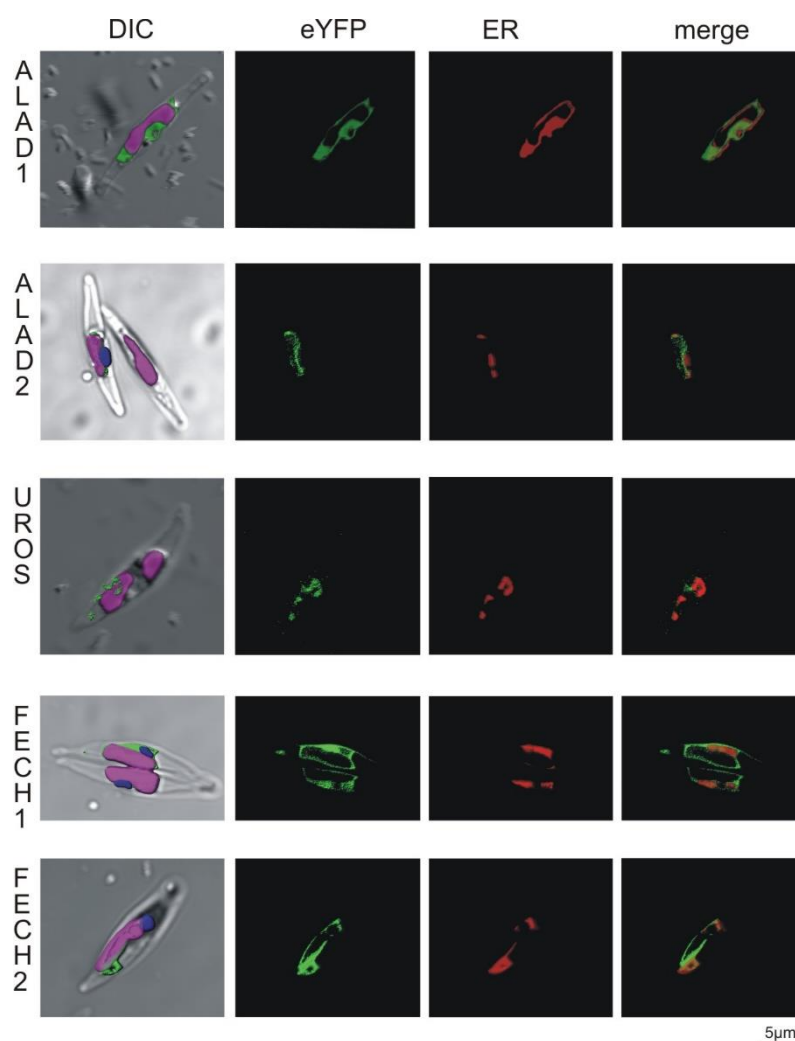

**Supplementary figure 1:** Heterologous expression of *Phaeodactylum tricornutum* with genes from *Chromera velia* heme pathway enzymes. Even though the majority of *P. tricornutum* cells heterologously expressed with ALAD1, ALAD2, UROS, FECH1 and FECH2 enzymes showed typical “blob-like” structures patterns, some cells displayed colocalization of eYFP signal (green) with signal of ER-Tracker™ Red (BODIPY® TR Glibenclamide). Plastid autofluorescence (magenta), DAPI (blue).
