# Supplementary material for: Using Diatom and Apicomplexan Models to Study the Heme Pathway of Chromera velia
Source: MDPI journal article supplement (doi:10.3390/ijms22126495), 2021-06-17
Supplement: s1 [file s1]

**Supplementary table 1: Output from prediction tools used in this work.** SP = signal peptide, TP = transit peptide, mTP = mitochondrial transit peptide, cTP = chloroplast transit peptide, (hc) = high confidence, (lc) = low confidence, AA = amino acid
